# Supplementary material
Source: PubMed Central journal article supplement (PMC8381716)
Supplement: 11136_2021_2973_MOESM4_ESM.pdf [file 11136_2021_2973_MOESM4_ESM.pdf]

**Supplementary Table 1. Descriptive statistics for each of the two component summary scores (MCS12 and PCS12) according to the investigated variables**

|                                                                                                                                                        |              | n   | Min   | 25th centile | Median | 75th centile | Max   | Mean  | Std    |
|--------------------------------------------------------------------------------------------------------------------------------------------------------|--------------|-----|-------|--------------|--------|--------------|-------|-------|--------|
|                                                                                                                                                        | <b>PCS12</b> | 211 | 21.35 | 48.31        | 54.12  | 56.10        | 63.67 | 50.97 | 8.271  |
|                                                                                                                                                        | <b>MCS12</b> | 211 | 16.58 | 35.66        | 47.31  | 52.65        | 63.41 | 44.15 | 10.721 |
| <b>S1.2. Sex</b>                                                                                                                                       |              |     |       |              |        |              |       |       |        |
| PCS12                                                                                                                                                  | Male         | 91  | 21.35 | 49.34        | 53.80  | 55.97        | 63.67 | 50.95 | 8.227  |
|                                                                                                                                                        | Female       | 120 | 27.94 | 47.35        | 54.30  | 56.37        | 63.67 | 50.98 | 8.338  |
| MCS12                                                                                                                                                  | Male         | 91  | 21.62 | 40.94        | 49.85  | 54.75        | 63.41 | 46.95 | 10.048 |
|                                                                                                                                                        | Female       | 120 | 16.58 | 32.55        | 44.77  | 50.65        | 57.89 | 42.03 | 10.770 |
| <b>S1.3. Age</b>                                                                                                                                       |              |     |       |              |        |              |       |       |        |
| PCS12                                                                                                                                                  | 18-30        | 37  | 30.29 | 51.07        | 56.02  | 57.63        | 63.67 | 53.69 | 7.196  |
|                                                                                                                                                        | 31-60        | 143 | 21.35 | 48.54        | 54.01  | 56.00        | 63.54 | 50.71 | 8.490  |
|                                                                                                                                                        | 60+          | 31  | 30.19 | 45.75        | 50.81  | 55.03        | 59.29 | 48.88 | 7.843  |
| MCS12                                                                                                                                                  | 18-30        | 37  | 17.97 | 30.62        | 44.82  | 51.08        | 60.76 | 41.52 | 11.938 |
|                                                                                                                                                        | 31-60        | 143 | 16.58 | 36.08        | 47.70  | 52.78        | 63.41 | 44.53 | 10.543 |
|                                                                                                                                                        | 60+          | 31  | 24.72 | 41.06        | 47.31  | 54.21        | 59.87 | 45.55 | 9.805  |
| <b>S3.1. Because of your increased risk of cancer due to a genetic predisposition, do you generally feel more fragile than the general population?</b> |              |     |       |              |        |              |       |       |        |
| PCS12                                                                                                                                                  | Very much    | 13  | 30.19 | 38.96        | 50.68  | 52.17        | 58.83 | 46.26 | 9.462  |
|                                                                                                                                                        | Much         | 63  | 22.40 | 41.46        | 48.54  | 54.52        | 63.67 | 47.10 | 9.492  |
|                                                                                                                                                        | A little     | 82  | 21.35 | 50.52        | 54.73  | 56.35        | 63.67 | 52.26 | 7.310  |
|                                                                                                                                                        | Not at all   | 53  | 30.20 | 53.07        | 55.91  | 56.76        | 61.83 | 54.72 | 4.923  |
| MCS12                                                                                                                                                  | Very much    | 13  | 17.97 | 31.01        | 46.02  | 50.15        | 55.88 | 41.75 | 11.668 |
|                                                                                                                                                        | Much         | 63  | 16.58 | 30.62        | 41.59  | 48.71        | 63.41 | 40.01 | 11.247 |
|                                                                                                                                                        | A little     | 82  | 21.62 | 39.71        | 47.27  | 52.38        | 60.76 | 45.33 | 9.461  |
|                                                                                                                                                        | Not at all   | 53  | 23.69 | 44.82        | 50.58  | 55.14        | 59.34 | 47.84 | 10.206 |
| <b>S3.4. Do you think that the COVID-19 (coronavirus) epidemic is more dangerous for you than the general population?</b>                              |              |     |       |              |        |              |       |       |        |
| PCS12                                                                                                                                                  | Very much    | 11  | 27.94 | 38.23        | 43.85  | 50.91        | 55.91 | 44.04 | 8.678  |
|                                                                                                                                                        | Much         | 59  | 22.40 | 39.08        | 50.68  | 55.18        | 63.67 | 47.48 | 10.014 |
|                                                                                                                                                        | A little     | 77  | 21.35 | 49.73        | 54.21  | 56.00        | 63.67 | 52.04 | 7.370  |
|                                                                                                                                                        | Not at all   | 64  | 30.20 | 51.76        | 55.37  | 56.82        | 61.83 | 54.08 | 5.217  |
| MCS12                                                                                                                                                  | Very much    | 11  | 26.73 | 28.22        | 40.65  | 44.25        | 51.60 | 37.47 | 8.868  |
|                                                                                                                                                        | Much         | 59  | 17.97 | 31.34        | 46.02  | 50.17        | 63.41 | 41.35 | 11.168 |
|                                                                                                                                                        | A little     | 77  | 16.58 | 39.43        | 46.38  | 53.65        | 60.76 | 44.93 | 10.151 |
|                                                                                                                                                        | Not at all   | 64  | 24.24 | 40.68        | 50.36  | 54.85        | 60.70 | 46.94 | 10.378 |
| <b>S2.1 Coronavirus (COVID-19) is scaring you:</b>                                                                                                     |              |     |       |              |        |              |       |       |        |
| PCS12                                                                                                                                                  | Very much    | 113 | 32.50 | 42.79        | 50.95  | 54.75        | 58.83 | 49.03 | 7.723  |
|                                                                                                                                                        | Much         | 14  | 30.20 | 43.99        | 51.12  | 55.43        | 63.54 | 48.91 | 8.754  |
|                                                                                                                                                        | Moderately   | 32  | 21.35 | 49.69        | 54.31  | 56.02        | 63.67 | 51.02 | 8.355  |
|                                                                                                                                                        | A little     | 6   | 28.39 | 50.87        | 54.90  | 56.75        | 63.67 | 52.89 | 7.479  |
|                                                                                                                                                        | Not at all   | 46  | 30.29 | 52.24        | 55.03  | 55.81        | 56.72 | 50.74 | 10.189 |

|                                                                                                                                                                                                                                                                                  |            |     |       |       |       |       |       |       |        |
|----------------------------------------------------------------------------------------------------------------------------------------------------------------------------------------------------------------------------------------------------------------------------------|------------|-----|-------|-------|-------|-------|-------|-------|--------|
| MCS12                                                                                                                                                                                                                                                                            | Very much  | 113 | 16.58 | 31.32 | 39.59 | 47.89 | 56.66 | 39.20 | 12.001 |
|                                                                                                                                                                                                                                                                                  | Much       | 14  | 17.97 | 28.27 | 41.36 | 50.33 | 63.41 | 39.74 | 12.318 |
|                                                                                                                                                                                                                                                                                  | Moderately | 32  | 21.62 | 38.98 | 47.31 | 52.00 | 60.76 | 44.76 | 9.615  |
|                                                                                                                                                                                                                                                                                  | A little   | 6   | 21.62 | 38.58 | 50.40 | 54.27 | 60.70 | 46.21 | 11.095 |
|                                                                                                                                                                                                                                                                                  | Not at all | 46  | 44.82 | 50.29 | 51.65 | 54.12 | 58.35 | 51.88 | 4.566  |
| <b>S3.3. Generally, does lengthening the time between one medical check and the next cause you anxiety?</b>                                                                                                                                                                      |            |     |       |       |       |       |       |       |        |
| PCS12                                                                                                                                                                                                                                                                            | Very much  | 23  | 22.40 | 40.73 | 50.34 | 53.75 | 63.67 | 46.90 | 10.147 |
|                                                                                                                                                                                                                                                                                  | Much       | 69  | 21.35 | 46.05 | 53.07 | 56.00 | 63.54 | 50.37 | 8.695  |
|                                                                                                                                                                                                                                                                                  | A little   | 87  | 27.94 | 49.88 | 54.31 | 56.04 | 63.67 | 51.52 | 7.671  |
|                                                                                                                                                                                                                                                                                  | Not at all | 32  | 30.20 | 52.95 | 55.12 | 56.94 | 59.91 | 53.66 | 6.311  |
| MCS12                                                                                                                                                                                                                                                                            | Very much  | 23  | 17.97 | 26.77 | 28.32 | 42.83 | 55.03 | 33.69 | 11.042 |
|                                                                                                                                                                                                                                                                                  | Much       | 69  | 24.72 | 36.51 | 44.82 | 50.36 | 63.41 | 43.18 | 9.652  |
|                                                                                                                                                                                                                                                                                  | A little   | 87  | 16.58 | 39.81 | 47.95 | 53.65 | 60.76 | 45.86 | 9.749  |
|                                                                                                                                                                                                                                                                                  | Not at all | 32  | 24.24 | 47.14 | 52.68 | 55.89 | 60.70 | 49.13 | 10.342 |
| <b>S3.5. During this period, did you have any planned medical checks that you could not attend due to the COVID-19 health emergency?</b>                                                                                                                                         |            |     |       |       |       |       |       |       |        |
| PCS12                                                                                                                                                                                                                                                                            | Yes        | 119 | 27.94 | 45.97 | 52.64 | 56.00 | 63.67 | 49.99 | 8.595  |
|                                                                                                                                                                                                                                                                                  | No         | 92  | 21.35 | 50.59 | 54.81 | 56.50 | 63.67 | 52.23 | 7.693  |
| MCS12                                                                                                                                                                                                                                                                            | Yes        | 119 | 16.58 | 32.25 | 45.17 | 51.27 | 60.70 | 42.59 | 11.193 |
|                                                                                                                                                                                                                                                                                  | No         | 92  | 21.62 | 40.88 | 48.08 | 53.02 | 63.41 | 46.17 | 9.772  |
| <b>S3.5.1. Did not being able to attend the planned medical checks because of the COVID-19 emergency cause you anxiety?</b>                                                                                                                                                      |            |     |       |       |       |       |       |       |        |
| PCS12                                                                                                                                                                                                                                                                            | Very much  | 12  | 35.70 | 43.96 | 50.13 | 52.96 | 58.83 | 48.14 | 7.690  |
|                                                                                                                                                                                                                                                                                  | Much       | 40  | 29.57 | 41.59 | 48.76 | 55.50 | 63.67 | 47.80 | 9.168  |
|                                                                                                                                                                                                                                                                                  | A little   | 43  | 30.29 | 50.46 | 54.62 | 56.25 | 63.54 | 51.42 | 8.358  |
|                                                                                                                                                                                                                                                                                  | Not at all | 24  | 27.94 | 51.28 | 54.26 | 55.99 | 59.91 | 52.00 | 7.902  |
| MCS12                                                                                                                                                                                                                                                                            | Very much  | 12  | 26.42 | 27.65 | 28.93 | 44.16 | 46.38 | 34.70 | 8.745  |
|                                                                                                                                                                                                                                                                                  | Much       | 40  | 17.97 | 31.15 | 39.11 | 47.32 | 57.83 | 39.07 | 10.812 |
|                                                                                                                                                                                                                                                                                  | A little   | 43  | 16.58 | 40.21 | 49.85 | 53.11 | 60.70 | 45.79 | 10.554 |
|                                                                                                                                                                                                                                                                                  | Not at all | 24  | 23.69 | 41.43 | 49.51 | 55.16 | 59.87 | 46.67 | 10.677 |
| <b>S3.6. Are you aware that within the Unit of Hereditary Digestive Tract Tumors of the IRCCS National Cancer Institute of Milan where you are under surveillance/treatment, there is a registry dedicated to the management (surveillance and treatment) of your condition?</b> |            |     |       |       |       |       |       |       |        |
| PCS12                                                                                                                                                                                                                                                                            | Yes        | 166 | 22.40 | 49.79 | 54.52 | 56.45 | 63.67 | 51.43 | 8.066  |
|                                                                                                                                                                                                                                                                                  | No         | 45  | 21.35 | 46.05 | 50.89 | 55.33 | 61.30 | 49.26 | 8.872  |
| MCS12                                                                                                                                                                                                                                                                            | Yes        | 166 | 17.97 | 36.56 | 47.57 | 52.77 | 60.76 | 44.57 | 10.692 |
|                                                                                                                                                                                                                                                                                  | No         | 45  | 16.58 | 34.08 | 43.53 | 52.19 | 63.41 | 42.60 | 10.804 |
